# Supplementary material
Source: PubMed Central journal article supplement (PMC7874916)
Supplement: mmc1.pdf [file mmc1.pdf]

**Supplemental information**

**Major role of IgM in the neutralizing activity  
of convalescent plasma against SARS-CoV-2**

**Romain Gasser, Marc Cloutier, Jérémie Prévost, Corby Fink, Éric Ducas, Shilei Ding, Nathalie Dussault, Patricia Landry, Tony Tremblay, Audrey Laforce-Lavoie, Antoine Lewin, Guillaume Beaudoin-Bussières, Annemarie Laumaea, Halima Medjahed, Catherine Larochelle, Jonathan Richard, Gregory A. Dekaban, Jimmy D. Dikeakos, Renée Bazin, and Andrés Finzi**

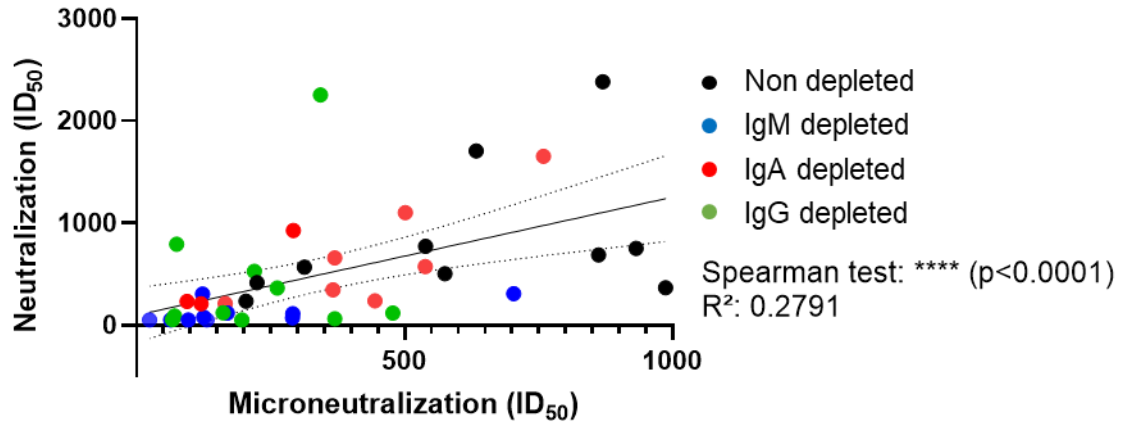

**Supplemental Figure 1. Correlation between the neutralizing capacity of the ten convalescent plasma tested by pseudoviral particle neutralization or microneutralization with infectious wild type SARS-CoV-2 virus - Related to Figure 2.**

Spearman correlation and linear regression fitting between the ID<sub>50</sub> obtained by microneutralization and pseudoviral particles neutralization assays. Dashed lines indicate the 95% confidence interval of the linear regression fitting. Non-depleted plasmas are shown in black, IgM-depleted in blue, IgA-depleted in red and IgG-depleted in green. Asterisks indicate the level of statistical significance obtained by a Wilcoxon signed rank test; \*\*\*\*p<0.0001.

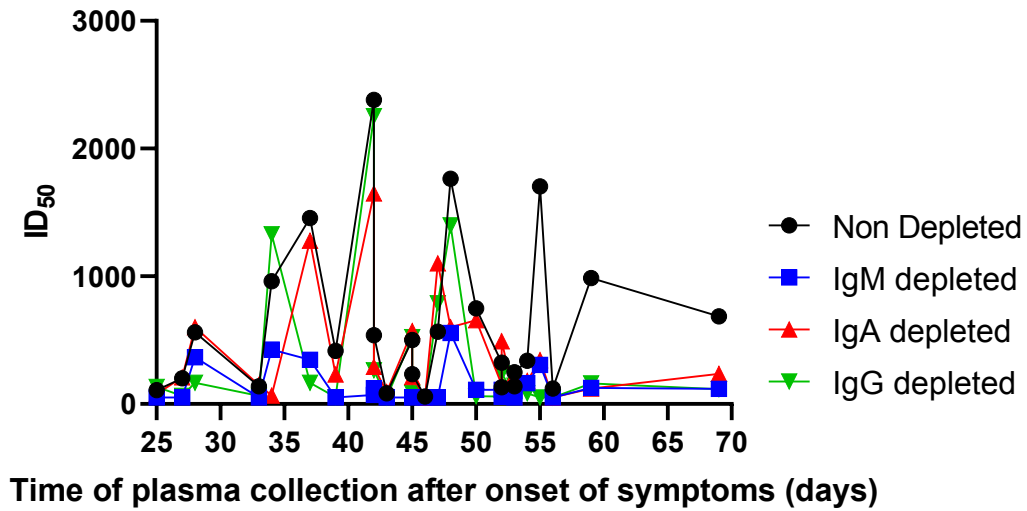

**Supplemental Figure 2. Neutralizing capacity of convalescent plasma as a function of the time of collection after symptoms onset – Related to Table 1.**

ID<sub>50</sub> obtained by neutralization experiments with pseudoviral particles were plotted as a function of the time of plasma collection after onset of symptoms. Therefore, each time point represents a single patient, the earliest plasma collection took place 25 days after the onset of symptoms of the corresponding patient and the latest, 69 days after the onset of symptoms. Non-depleted plasmas are shown in black, IgM-depleted in blue, IgA-depleted in red and IgG-depleted in green.
